# Supplementary material
Source: Research Square preprint supplement (doi:10.21203/rs.3.rs-9843034/v1)
Supplement: Supplementary file 1 [file 5383839d10f2c2b0afd10548.docx]

**Supplementary Table 1. Participant characteristics (n = 176)**

| **Variable** | **Category** | **n (%)** |
| --- | --- | --- |
| **Gender** |  |  |
|  | Male | 96 (54.5%) |
|  | Female | 80 (45.5%) |
| **Year of study** |  |  |
|  | Year 2 | 25 (14.2%) |
|  | Year 3 | 13 (7.4%) |
|  | Year 4 | 138 (78.4%) |
| **Self-rated academic performance** |  |  |
|  | Excellent | 24 (13.6%) |
|  | Good | 92 (52.3%) |
|  | Average | 53 (30.1%) |
|  | Poor | 7 (4.0%) |
| **Theoretical course grade** |  |  |
|  | ≥85 (Excellent) | 21 (11.9%) |
|  | 75–84 (Good) | 92 (52.3%) |
|  | 65–74 (Average) | 52 (29.5%) |
|  | 60–64 (Pass) | 11 (6.3%) |
| **Career intention (OB-GYN)** |  |  |
|  | Yes | 7 (4.0%) |
|  | No | 98 (55.7%) |
|  | Uncertain | 71 (40.3%) |
| **Digital literacy (confidence)** |  |  |
|  | Very low | 1 (0.6%) |
|  | Low | 6 (3.4%) |
|  | Moderate | 117 (66.5%) |
|  | High | 41 (23.3%) |
|  | Very high | 11 (6.3%) |
| **AI usage frequency** |  |  |
|  | Occasionally | 66 (37.5%) |
|  | Weekly | 83 (47.2%) |
|  | Daily | 27 (15.3%) |
| **Medical database familiarity** |  |  |
|  | None | 14 (8.0%) |
|  | Heard of but not used | 47 (26.7%) |
|  | Occasional use | 97 (55.1%) |
|  | Proficient | 18 (10.2%) |

**Supplementary Table 2. Acceptance of AI-assisted pre-clerkship preparation**

| **Item** | **Mean ± SD** | **Agreement (%)** |
| --- | --- | --- |
| Openness to AI-assisted learning | 3.78 ± 0.68 | 67.6% |
| Willingness to participate | 3.73 ± 0.70 | 63.0% |

**Supplementary Table 3. Univariate analysis of perceived usefulness associated with behavioral intention**

| **Variable** | **Category** | **Behavioral intention**  **Mean ± SD** | **Test** | **P value** |
| --- | --- | --- | --- | --- |
| Understanding disease knowledge |  |  | r=0.846** | P<0.001 |
|  | Strongly disagree | 1.0 ± 0 |  |  |
|  | Disagree | 2.5 ± 0.707 |  |  |
|  | Neutral | 3.2 ± 0.44 |  |  |
|  | Agree | 3.95 ± 0.307 |  |  |
|  | Strongly agree | 4.9 ± 0.308 |  |  |
| Focused observation |  |  | r =0.787** | P<0.001 |
|  | Strongly disagree | 1.0 ± 0 |  |  |
|  | Disagree | 3.5 ± 0.707 |  |  |
|  | Neutral | 3.21 ± 0.478 |  |  |
|  | Agree | 3.93 ± 0.346 |  |  |
|  | Strongly agree | 4.82 ± 0.395 |  |  |
| Communication efficiency |  |  | r =0.803** | P<0.001 |
|  | Strongly disagree | 1.0 ± 0 |  |  |
|  | Disagree | 3.0 ± 1.0 |  |  |
|  | Neutral | 3.21 ± 0.448 |  |  |
|  | Agree | 3.92 ± 0.352 |  |  |
|  | Strongly agree | 4.86 ± 0.359 |  |  |
| Lifelong learning ability |  |  | r =0.819** | P<0.001 |
|  | Strongly disagree | 1.0 ± 0 |  |  |
|  | Disagree | 2.5 ± 0.707 |  |  |
|  | Neutral | 3.22 ± 0.484 |  |  |
|  | Agree | 3.89 ± 0.310 |  |  |
|  | Strongly agree | 4.83 ± 0.388 |  |  |
| Compensating clinical scarcity |  |  | r =0.821** | P<0.001 |
|  | Strongly disagree | 1.0 ± 0 |  |  |
|  | Disagree | 3.0 ± 0.816 |  |  |
|  | Neutral | 3.17 ± 0.423 |  |  |
|  | Agree | 3.92 ± 0.278 |  |  |
|  | Strongly agree | 4.79 ± 0.509 |  |  |

**Supplementary Table 4. Univariate analysis of demographic & academic factors associated with behavioral intention**

| **Variable** | **Category** | **Behavioral intention**  **Mean ± SD** | **Test** | ***P* value** |
| --- | --- | --- | --- | --- |
| Gender |  |  | t=-1.612 | *P*=0.113 |
|  | Male | 3.66 ± 0.723 |  |  |
|  | Female | 3.83 ± 0.652 |  |  |
| Year of study |  |  | Spearman Rho=0.076 | *P*=0.316 |
|  | Year 2 | 3.88 ± 0.666 |  |  |
|  | Year 3 | 3.92 ± 0.862 |  |  |
|  | Year 4 | 3.69 ± 0.681 |  |  |
| Self-rated performance |  |  | Spearman Rho=0.318** | *P*=0.004 |
|  | Excellent | 4.25 ±0.676 |  |  |
|  | Good | 3.74 ± 0.709 |  |  |
|  | Average | 3.53 ± 0.575 |  |  |
|  | Poor | 3.43 ± 0.535 |  |  |
| Theoretical grade |  |  | Spearman Rho=0.213** | *P*=0.004 |
|  | ≥85 (Excellent) | 3.95 ± 0.865 |  |  |
|  | 75–84 (Good) | 3.82 ± 0.645 |  |  |
|  | 65–74 (Average) | 3.56 ± 0.698 |  |  |
|  | 60–64 (Pass) | 3.45 ± 0.522 |  |  |
| Career intention (OBGYN) |  |  | ANOVA F=2.996 | *P*=0.053 |
|  | Yes | 4.0 ± 0.816 |  |  |
|  | No | 3.62 ± 0.767 |  |  |
|  | Uncertain | 3.86 ± 0.542 |  |  |

**Supplementary Table 5. Univariate analysis of digital literacy factors associated with behavioral intention**

| **Variable** | **Category** | **Behavioral intention**  **Mean ± SD** | **Test** | **P value** |
| --- | --- | --- | --- | --- |
| Digital literacy confidence |  |  | Spearman Rho=0.269** | P<0.001 |
|  | Very low | 3.0 ± 0 |  |  |
|  | Low | 3.33 ± 0.516 |  |  |
|  | Moderate | 3.65 ± 0.62 |  |  |
|  | High | 3.95 ± 0.773 |  |  |
|  | Very high | 4.09 ± 0.944 |  |  |
| AI usage frequency |  |  | Spearman Rho=0.187* | P=0.013 |
|  | Occasional (a few times per month) | 3.59 ± 0.656 |  |  |
|  | Frequent (a few times per week) | 3.77 ± 0.687 |  |  |
|  | Daily or almost daily use | 3.96 ± 0.759 |  |  |
| Medical database familiarity |  |  | Spearman Rho=0.172* | P=0.023 |
|  | None | 3.57 ± 0.514 |  |  |
|  | Aware (but never used) | 3.57 ± 0.651 |  |  |
|  | Occasional use | 3.79 ± 0.691 |  |  |
|  | Proficient | 3.94 ± 0.873 |  |  |

**Supplementary Table 6. Univariate analysis of clerkship expectation factors associated with behavioral intention**

| **Variable** | **Category** | **Behavioral intention**  **Mean ± SD** | **Test** | **P value** |
| --- | --- | --- | --- | --- |
| Anticipated difficulty (theory-practice gap) |  |  | r=0.417 | P=0.062 |
|  | Strongly disagree | 4.33 ± 1.16 |  |  |
|  | Disagree | 4.05 ± 0.524 |  |  |
|  | Neutral | 3.45 ± 0.64 |  |  |
|  | Agree | 3.76 ± 0.554 |  |  |
|  | Strongly agree | 4.54 ± 0.660 |  |  |
| Opportunity restriction concern |  |  | r =0.344** | P<0.001 |
|  | Strongly disagree | 4.0 ± 0 |  |  |
|  | Disagree | 3.78 ± 0.667 |  |  |
|  | Neutral | 3.45 ± 0.700 |  |  |
|  | Agree | 3.84 ± 0.527 |  |  |
|  | Strongly agree | 3.73 ± 0.695 |  |  |
